# Supplementary material for: A robust and refillable magnetic sponge capsule for remotely triggered drug release
Source: Royal Society of Chemistry journal article supplement (doi:10.1039/c6tb02762h), 2016-01-01
Supplement: c6tb02762h1.pdf [file c6tb02762h1.pdf]

## Supporting Information

### A robust and refillable magnetic sponge capsule for remotely triggered drug release

Jingru Shi,<sup>a</sup> Hongbin Zhang,<sup>\*a</sup> John Jackson,<sup>b</sup> Ali Shademani,<sup>a</sup> and Mu Chiao<sup>\*a</sup>

<sup>a</sup> Department of Mechanical Engineering, University of British Columbia, Vancouver, British Columbia V6T 1Z4, Canada

<sup>b</sup> Department of Pharmaceutical Sciences, University of British Columbia, Vancouver, British Columbia V6T 1Z4, Canada

\*E-mail: izhanghongbin@gmail.com and muchiao@mech.ubc.ca

**Movie S1.** Reversible deformation of the sponge with magnetic stimuli.

**Movie S2.** MB release from a fully open (non-sealed) sponge capsule.

**Movie S3.** MB release from the sponge capsule with sealed top and bottom surfaces.

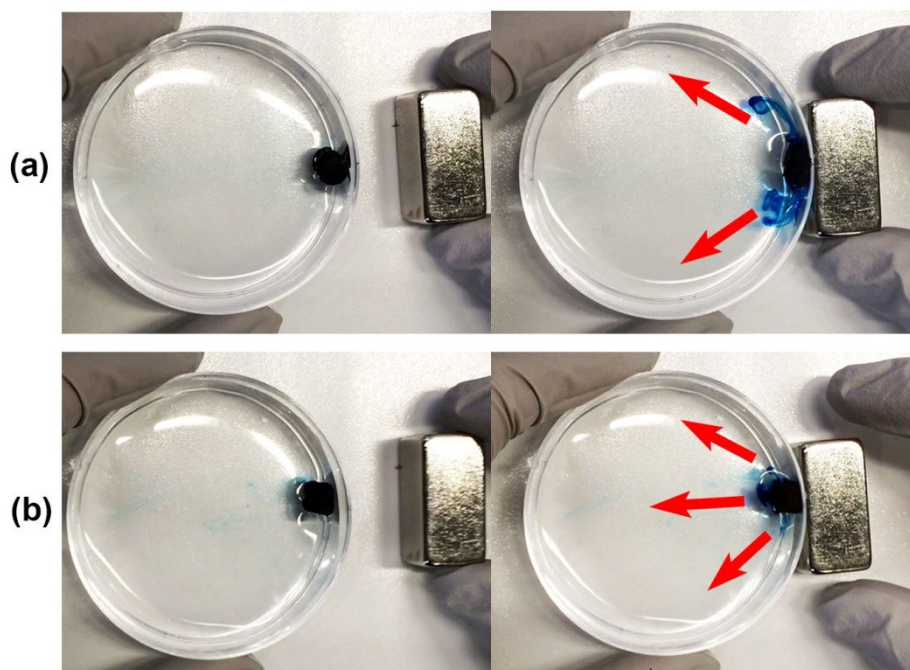

**Fig. S1** Methylene blue (MB) release from PDMS sponge capsule. (a) Release image captured from a top and bottom sealed capsule; (b) Release image captured from a capsule without sealing. The arrows indicate the release directions.

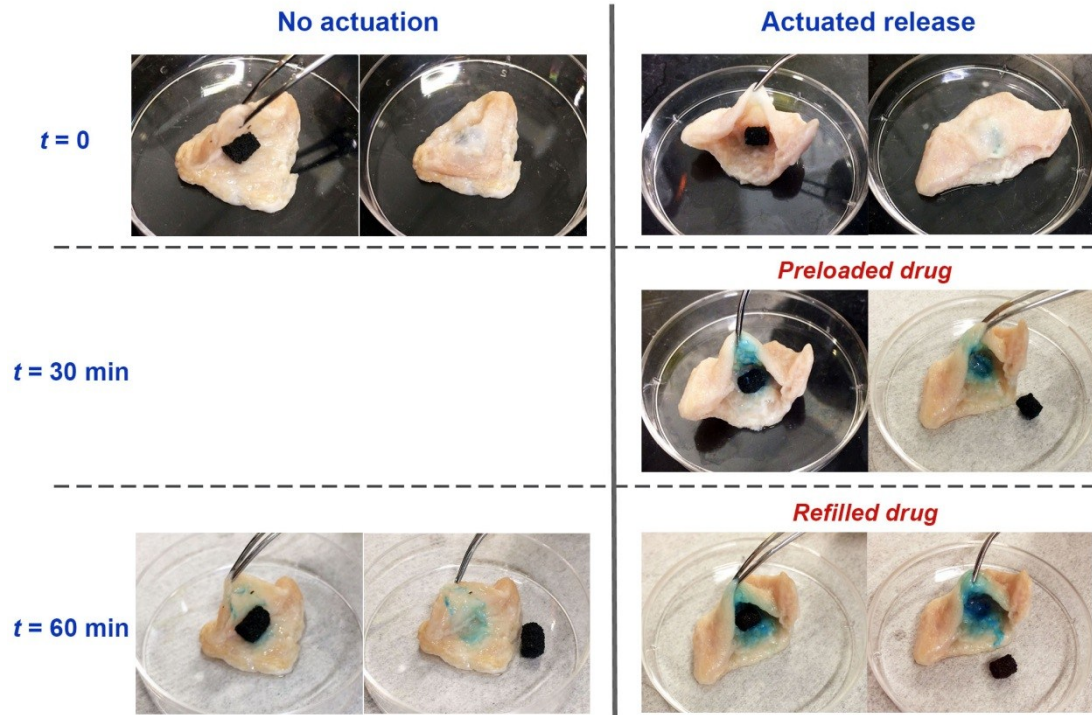

**Fig. S2** *Ex vivo* evaluation of the performance of the sponge capsules. The left column shows the images taken in a control experiment where no magnetic actuation was applied to the implanted capsule. The right column shows the actuated MB release before and after the refilling procedure.
